# Supplementary material for: Metallic bonds and thermal vibration in brass
Source: Royal Society of Chemistry journal article supplement (doi:10.1039/d2cp05035h), 2023-01-01
Supplement: d2cp05035h1.pdf [file d2cp05035h1.pdf]

Electronic Supplementary Information  
**Metallic Bonds and Thermal Vibration in Brass**

Toshihiko Yokoyama

yokoyama@ims.ac.jp

Department of Materials Molecular Science, Institute for Molecular Science,  
Myodaiji-cho, Okazaki, 444-8585, Japan

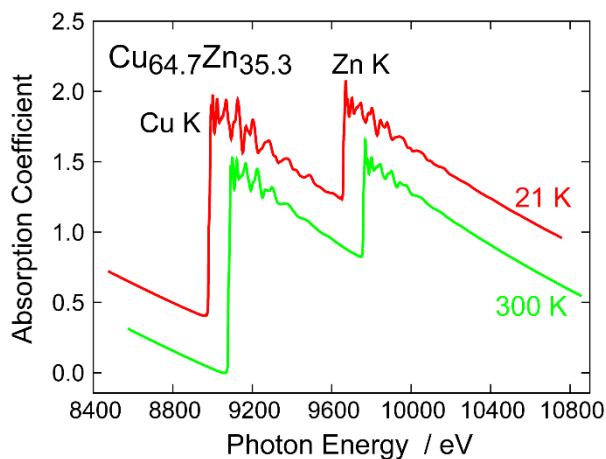

**Fig. S1** Typical Cu and Zn K-edge EXAFS spectra of the brass foil at 21 and 300 K. The 300-K spectrum is shifted to the bottom right.

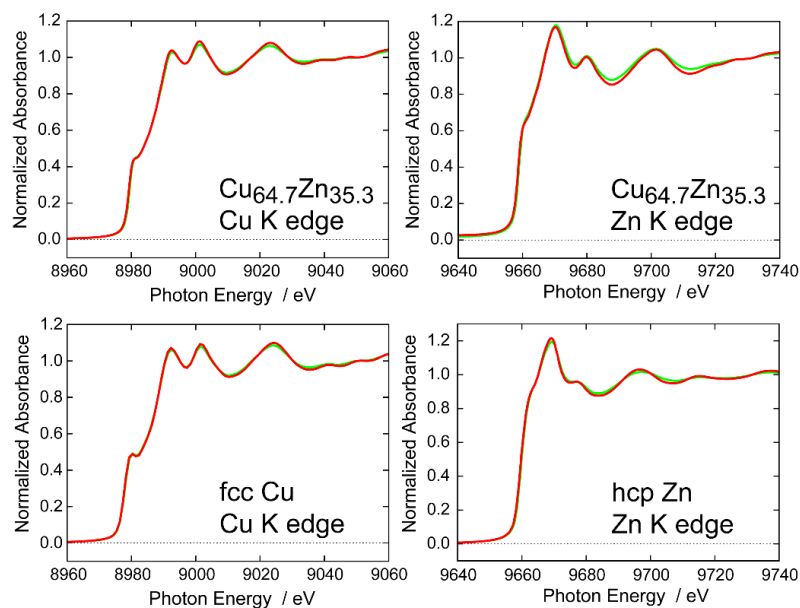

**Fig. S2** Cu and Zn K-edge XANES spectra of the brass foil at 21 (red) and 300 (green) K, together with those of *fcc* Cu and *hcp* Zn foils. The Cu K-edge XANES of brass is quite similar to that of *fcc* Cu, while the Zn K-edge XANES shows a so-called white line at ~9668 eV, followed by typical *fcc* XANES features at higher photon energy. For XANES peak analysis, see the references as T. Yamamoto, *X-Ray Spectrom.* 2008, **37**, 572 and W. Olovsson, B. Alling, and M. Magnuson, *J. Phys. Chem. C.* 2016, **120**, 12890, for instance.

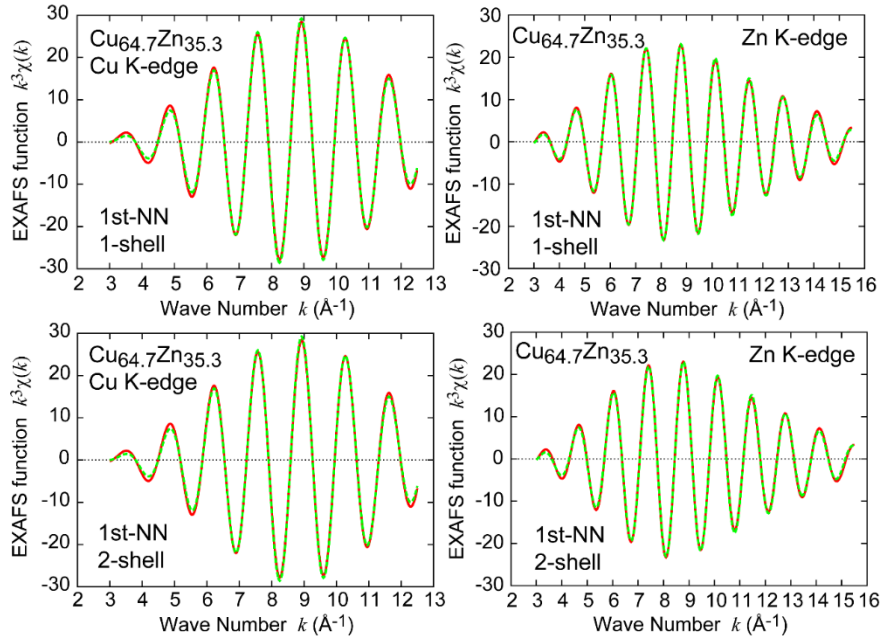

**Fig. S3** Curve fitting analysis for the first-NN shells in the Cu and Zn K-edge EXAFS of the brass foil at 21 K, using the FEFF standards. As is described in the main text, the one-shell analysis is resultantly found to be more reliable.

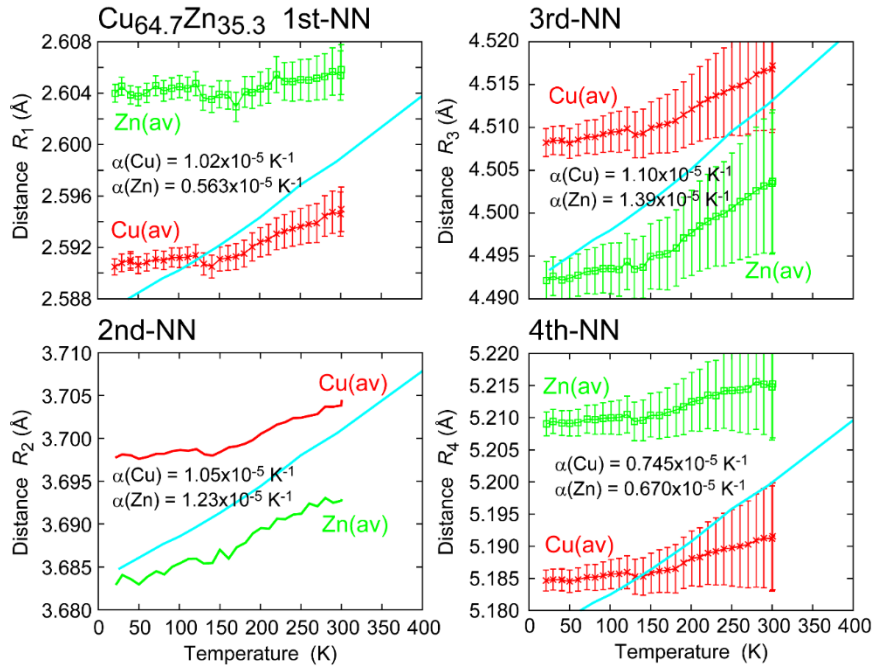

**Fig. S4** Temperature dependence of the interatomic distances for the first- to fourth-NN shells in the Cu (red) and Zn (green) K-edge EXAFS of the brass foil, using the empirical standard method. The distances corresponding to the lattice constant  $a_0$  are also depicted as a light-blue line.

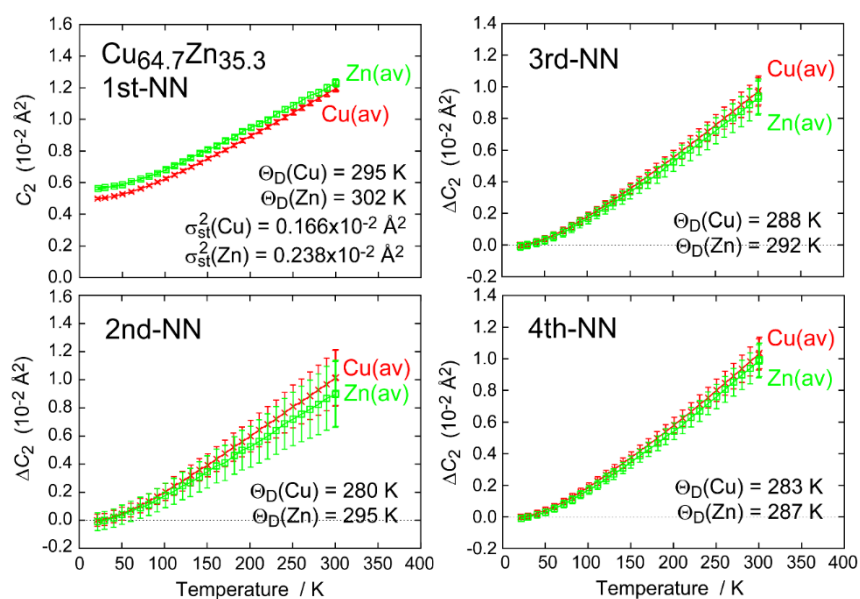

**Fig. S5** Temperature dependence of the Debye-Waller factors  $C_2$  for the first- to fourth-NN shells in the Cu (red) and Zn (green) K-edge EXAFS of the brass foil, using the empirical standard method. The estimated Debye temperature for each curve is given in the figure.

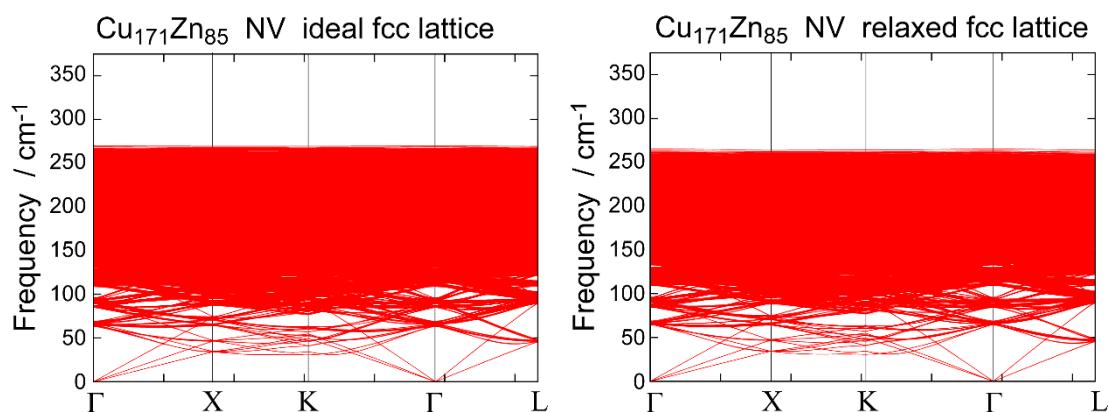

**Fig. S6** Phonon dispersion obtained by the theoretical normal vibrational analysis of the  $Cu_{171}Zn_{85}$  superlattices for the ideal *fcc* lattice and relaxed (structurally optimized) lattice, using the EAM potentials.

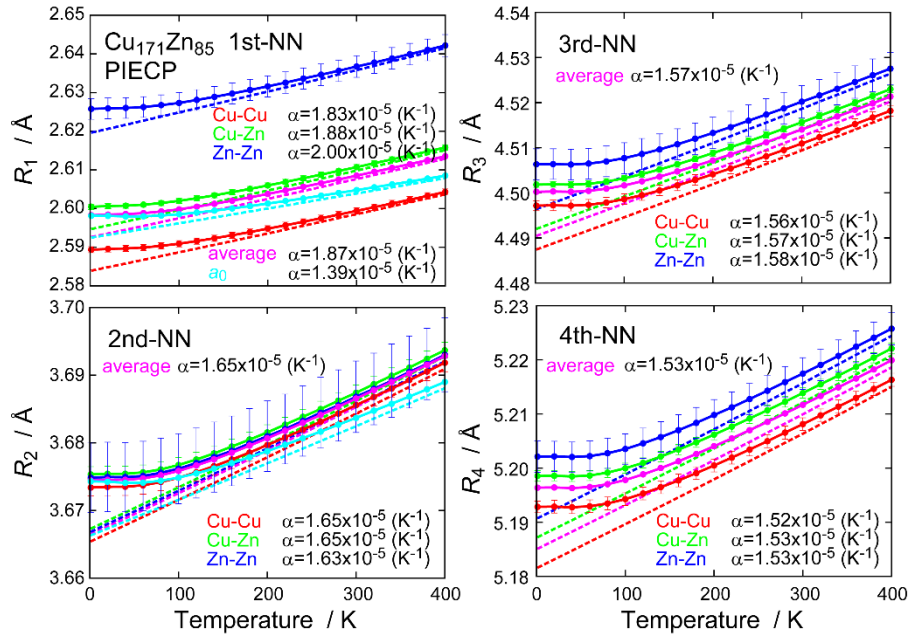

**Fig. S7** Temperature dependence of the interatomic distances for the first- to fourth-NN shells in the PIECP simulations of  $\text{Cu}_{171}\text{Zn}_{85}$ . The estimated thermal expansion coefficient at  $\sim 300$  K for each curve is given in the figure.

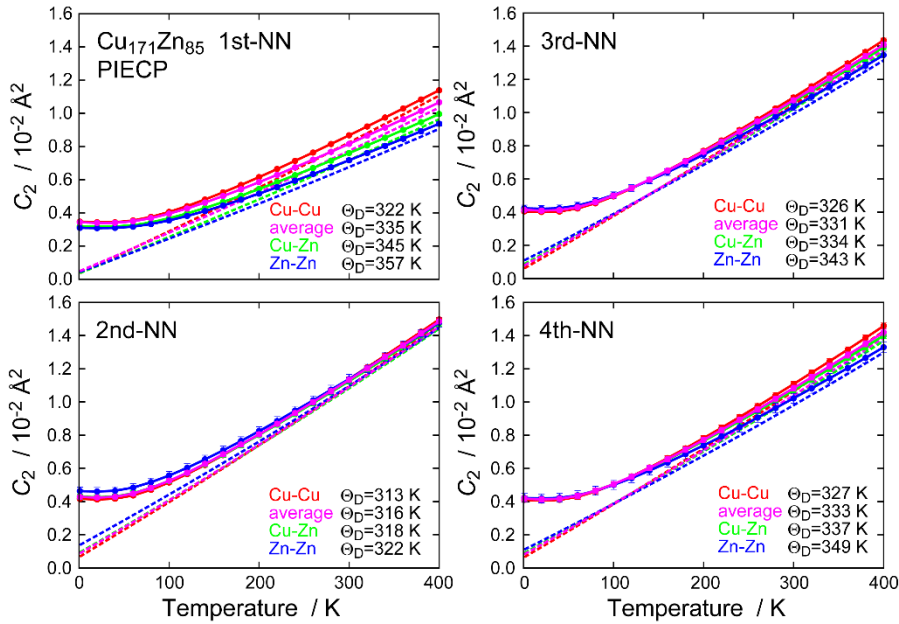

**Fig. S8** Temperature dependence of the Debye-Waller factors  $C_2$  for the first- to fourth-NN shells in the PIECP simulations of  $\text{Cu}_{171}\text{Zn}_{85}$ . The estimated Debye temperature for each curve is given in the figure.

**Table S1**  $k$  and  $R$  ranges in the EXAFS analysis.  $\Delta k_{\text{FT}}$  is the Fourier transform  $k$  range,  $\Delta R_{\text{fit}}$  the inverse Fourier transform  $R$  range, and  $\Delta k_{\text{fit}}$  is the curve-fitting  $k$  range.  $N_d$  is the independent data point given as  $N_d \approx 2\Delta k_{\text{fit}}\Delta R_{\text{fit}}/\pi + 1$ .

|                     |                                              |                                          |                                               |       |
|---------------------|----------------------------------------------|------------------------------------------|-----------------------------------------------|-------|
| First NN            | $\Delta k_{\text{FT}}$ ( $\text{\AA}^{-1}$ ) | $\Delta R_{\text{fit}}$ ( $\text{\AA}$ ) | $\Delta k_{\text{fit}}$ ( $\text{\AA}^{-1}$ ) | $N_d$ |
| Cu K edge           | 2.6-12.7                                     | 1.8-2.8                                  | 3.0-12.5                                      | 7.05  |
| Zn K edge           | 2.4-15.7                                     | 1.7-2.7                                  | 3.0-15.5                                      | 8.96  |
| Second to Fourth NN | $\Delta k_{\text{FT}}$ ( $\text{\AA}^{-1}$ ) | $\Delta R_{\text{fit}}$ ( $\text{\AA}$ ) | $\Delta k_{\text{fit}}$ ( $\text{\AA}^{-1}$ ) | $N_d$ |
| Cu K edge           | 2.6-12.7                                     | 3.10-5.35                                | 4.0-12.5                                      | 13.18 |
| Zn K edge           | 2.4-15.7                                     | 3.10-5.30                                | 5.0-14.0                                      | 13.61 |

**Table S2** Results of the EXAFS analysis for the first-NN shells using the FEFF standards. The values in italic are the fixed parameters in the curve-fitting analysis. The values in the parentheses are the estimated  $3\sigma$  errors.

| Data             | Method  | shell   | $NS_0^2$    | $R$ ( $\text{\AA}$ ) | $\Delta E_0$ (eV) | $C_2$ ( $10^{-2} \text{\AA}^2$ ) | $R$ -factor | $\chi^2$ | $\chi^2_{\nu}$ |
|------------------|---------|---------|-------------|----------------------|-------------------|----------------------------------|-------------|----------|----------------|
| Cu K edge<br>21K | 1-shell | average | 11.09(12)   | 2.591(1)             | 0.2(2)            | 0.499(6)                         | 0.0402      | 77.0     | 25.3           |
|                  | 2-shell | Cu-Cu   | <i>7.17</i> | 2.557(1)             | -2.9(3)           | 0.701(14)                        | 0.0339      | 54.6     | 52.1           |
|                  |         | Cu-Zn   | <i>3.91</i> | 2.601(1)             | -0.4(3)           | 0.181(10)                        |             |          |                |
| Zn K edge<br>21K | 1-shell | average | 10.97(14)   | 2.603(1)             | -2.7(2)           | 0.571(7)                         | 0.0357      | 69.3     | 14.0           |
|                  | 2-shell | Zn-Cu   | <i>7.10</i> | 2.598(1)             | -3.6(3)           | 0.655(13)                        | 0.0369      | 73.8     | 25.0           |
|                  |         | Zn-Zn   | <i>3.87</i> | 2.606(1)             | -1.7(4)           | 0.458(14)                        |             |          |                |

The reliability factors are defined as

$$R\text{-factor} = \sqrt{\frac{\sum_{i=1}^{N_p} (\chi_{\text{obs}}(k_i) - \chi_{\text{calc}}(k_i))^2}{\sum_{i=1}^{N_p} (\chi_{\text{obs}}(k_i))^2}}$$

for the  $R$ -factor, and  $\chi^2$  and  $\chi^2_{\nu}$  are given as

$$\chi^2 = \frac{N_d}{N_p} \sum_{i=1}^{N_p} \left( \frac{\chi_{\text{obs}}(k_i) - \chi_{\text{calc}}(k_i)}{\varepsilon(k_i)} \right)^2 \quad \text{and} \quad \chi^2_{\nu} = \frac{1}{N_d - N_{\text{fit}}} \frac{N_d}{N_p} \sum_{i=1}^{N_p} \left( \frac{\chi_{\text{obs}}(k_i) - \chi_{\text{calc}}(k_i)}{\varepsilon(k_i)} \right)^2,$$

where  $N_p$  and  $N_{\text{fit}}$  are the numbers of total data points and fitting variables, and  $\varepsilon(k_i)$  the error at  $k_i$ .

**Table S3** Results of the EXAFS analysis for the second- to fourth-NN shells using the FEFF standards. The values in the parentheses are the estimated  $3\sigma$  errors.

| Data             | shell | $NS_0^2$ | $R$ (Å)  | $\Delta E_0$ (eV) | $C_2$ (Å <sup>2</sup> ) | $R$ -factor | $\chi^2$ | $\chi^2_{\nu}$ |
|------------------|-------|----------|----------|-------------------|-------------------------|-------------|----------|----------------|
| Cu K edge<br>21K | 2nd   | 14.3(9)  | 3.698(4) | 3.3(5)            | 1.07(4)                 | 0.0439      | 51.3     | 43.7           |
|                  | 3rd   | 24.0(7)  | 4.508(2) | -2.0(2)           | 0.61(2)                 |             |          |                |
|                  | 4th   | 15.5(5)  | 5.185(2) | -4.5(2)           | 0.76(2)                 |             |          |                |
| Zn K edge<br>21K | 2nd   | 12.2(11) | 3.683(6) | -1.3(7)           | 1.18(6)                 | 0.0353      | 40.4     | 25.2           |
|                  | 3rd   | 35.0(13) | 4.492(2) | -7.4(3)           | 0.99(2)                 |             |          |                |
|                  | 4th   | 22.8(8)  | 5.209(2) | -4.0(2)           | 0.94(2)                 |             |          |                |

**Table S4** EAM Potential parameters of *fcc* Cu, *hcp* Zn,  $L_{12}$  CuZn<sub>3</sub>, and  $L_{12}$  Cu<sub>3</sub>Zn to simulate the brass as Cu<sub>171</sub>Zn<sub>85</sub>. See for the definitions of the potential parameters, for instance, H. -S. Jang, D. Seol, and B. -J. Lee, *J. Magnes. Alloy* **9**, 317-335 (2021); DOI: 10.1016/j.jma.2020.09.006.

|                             | $E_c$ (eV) | $r_e$ (Å) | $B$ (GPa) | $a$    | $d$  |
|-----------------------------|------------|-----------|-----------|--------|------|
| <i>fcc</i> Cu               | 3.54       | 2.543     | 142.0     | 5.1551 | 0.05 |
| <i>hcp</i> Zn               | 1.09       | 2.638     | 70.4958   | 3.3423 | 0.05 |
| $L_{12}$ CuZn <sub>3</sub>  | 1.70       | 2.614     | 88.4      | 6.0694 | 0.05 |
| $L_{12}$ Cu <sub>3</sub> Zn | 2.93       | 2.567     | 124.1     | 5.3366 | 0.05 |

|    | $\beta_0$ | $\beta_1$ | $\beta_2$ | $\beta_3$ | $t_1$ | $t_2$ | $t_3$ | $A$  |
|----|-----------|-----------|-----------|-----------|-------|-------|-------|------|
| Cu | 3.83      | 2.20      | 6.00      | 2.20      | 2.72  | 3.04  | 1.95  | 0.94 |
| Zn | 3.50      | 3.00      | 0.00      | 2.00      | 3.00  | 6.00  | -10.0 | 0.70 |

|        | $C_{\min}$ | $C_{\max}$ |
|--------|------------|------------|
| CuCuCu | 1.21       | 2.80       |
| ZnZnZn | 1.00       | 2.80       |
| CuZnCu | 1.21       | 2.80       |
| ZnCuZn | 1.00       | 2.80       |
| CuCuZn | 1.1025     | 2.80       |
| CuZnZn | 1.1025     | 2.80       |
